# Supplementary material for: Integrated analysis of differentially expressed long noncoding RNAs and mRNAs associated with high-fat diet-induced hepatic insulin resistance in mice
Source: Nutr Metab (Lond). 2020 Jun 18;17:45. doi: 10.1186/s12986-020-00467-7 (PMC7302146; doi:10.1186/s12986-020-00467-7)
Supplement: Supplementary file 2 — Additional file 2. [file 12986_2020_467_MOESM2_ESM.xlsx]

## Sheet: Sheet1
sample	Mapped-seq-num/Total-seq-num	Mapping rate
ND1	103731875/106978912	0.9696
ND2	92422712/95221936	0.9706
ND3	95891103/98972878	0.9689
ND4	98259380/101598436	0.9671
ND5	100857290/104161070	0.9683
HFD1	86675283/89233800	0.9713
HFD2	87600033/90806368	0.9647
HFD3	83154886/85804840	0.9691
HFD4	84399108/87822900	0.961
HFD5	91765940/95093454	0.965
